# Supplementary material for: HMF etherification using NH4-exchanged zeolites
Source: Royal Society of Chemistry journal article supplement (doi:10.1039/c5nj03461b), 2016-01-01
Supplement: c5nj03461b1.pdf [file c5nj03461b1.pdf]

## SUPPLEMENTARY MATERIALS

MANUSCRIPT ID: NJ-ART-12-2015-003461

### HMF etherification using NH<sub>4</sub>-exchanged zeolites

Katia Barbera<sup>a</sup>, Paola Lanzafame<sup>a,\*</sup>, Siglinda Perathoner<sup>a</sup>, Gabriele Centi<sup>a</sup>, Massimo Migliori<sup>b</sup>, Alfredo Aloise<sup>b</sup>, Girolamo Giordano<sup>b</sup>

<sup>a</sup> *University of Messina, Section Industrial Chemistry, ERIC aisbl and CASPE-INSTM, V.le F. Stagno d'Alcontres 31, 98166 Messina, Italy.*

<sup>b</sup> *Department of Environmental and Chemical Engineering, University of Calabria, via Bucci, 87036 Rende, Italy*

\* Corresponding author: [planzafame@unime.it](mailto:planzafame@unime.it)

**S1.** Water content monitored during reaction course for all the samples under study.

| <i>ppm H<sub>2</sub>O</i> | <i>NH<sub>4</sub>-BEA</i> | <i>H-BEA</i> | <i>NH<sub>4</sub>-MFI</i> | <i>H-MFI</i> | <i>NH<sub>4</sub>-Sil</i> | <i>H-Sil</i> |
|---------------------------|---------------------------|--------------|---------------------------|--------------|---------------------------|--------------|
| 0.5 h                     | 5522                      | 8978         | 240                       | 3003         | 1246                      | 2260         |
| 5 h                       | 20775                     | 21556        | 4644                      | 17683        | 7020                      | 18875        |
